# Supplementary material
Source: publisher figshare collection journal article supplement (https://springernature.figshare.com/ndownloader/files/22839608)
Supplement: Supplementary file [file 22839608]

**Niche switching and leapfrog foraging: movement ecology of sympatric petrels during the early breeding season**

Petra Quillfeldt, Henri Weimerskirch, Karine Delord, Yves Cherel

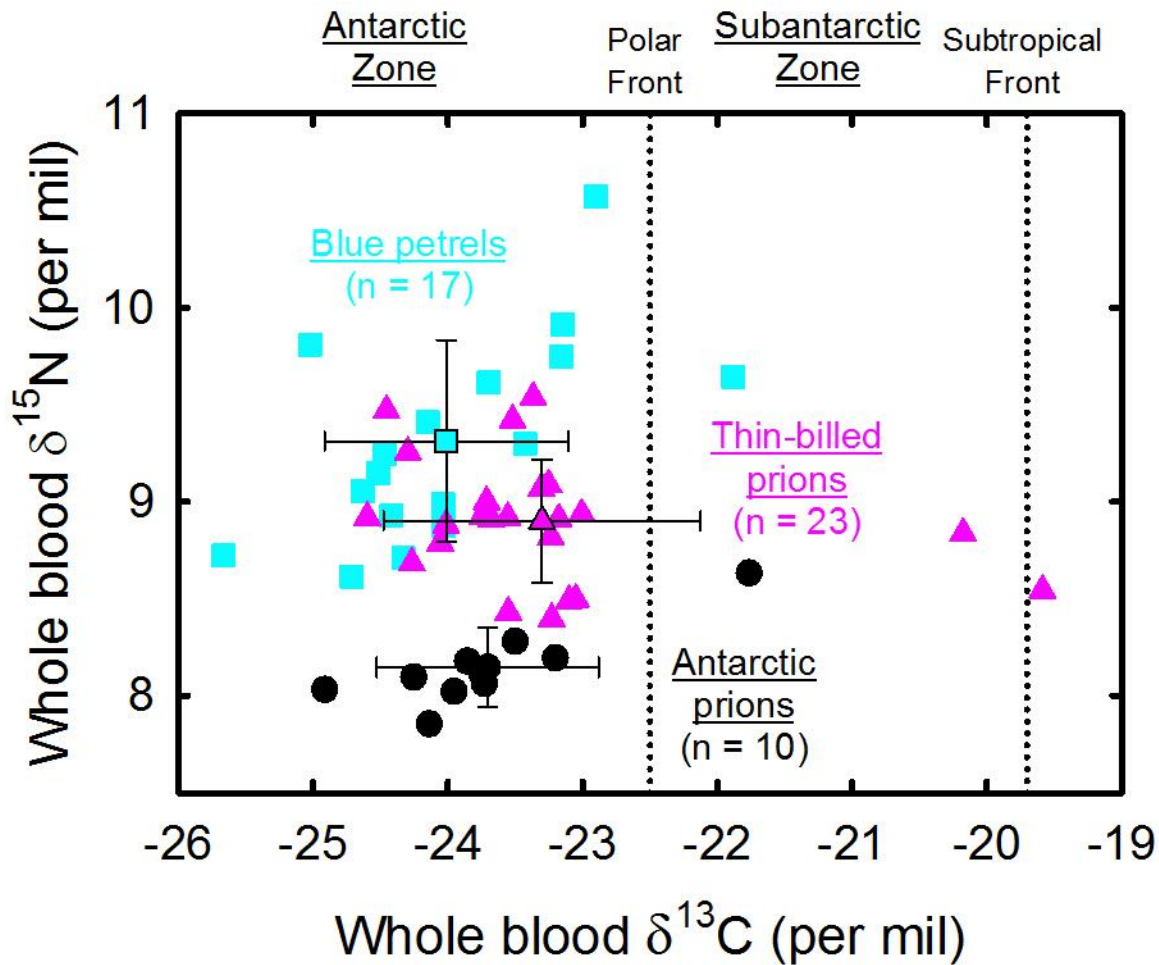

**Fig. S2.** Whole blood  $\delta^{15}\text{N}$  versus  $\delta^{13}\text{C}$  values of Blue petrels (blue squares), Thin-billed prions (red triangles) and Antarctic prions (black circles) from Kerguelen Islands during the early breeding period. Both individual values and means  $\pm$  SD are indicated.
